# Supplementary material for: Percutaneous Mitral Valve Repair versus Optimal Medical Therapy in Patients with Functional Mitral Regurgitation: A Systematic Review and Meta-Analysis
Source: J Interv Cardiol. 2019 Apr 21;2019:2753146. doi: 10.1155/2019/2753146 (PMC6739764; doi:10.1155/2019/2753146)
Supplement: Supplementary Materials — Supplementary Table S1: search strategy used in each database searched. Supplementary Table S2: Quality Assessment of the Observational Studies using the Robins-1 tool. Supplementary Table S3: Quality Assessment of the Randomized Studies using the ROB 2.0 scale. Supplementary Table S4: Pooled Analysis for the Number Needed to Treat. Supplementary Figure-1: leave-one-out meta-analysis for the 1-year mortality outcome. Supplementary Figure-2: leave-one-out meta-analysis for the 2-year mortality outcome. Supplementary Figure-3: leave-one-out meta-analysis for the 30-day mortality outcome. Supplementary Figure-4: leave-one-out meta-analysis for the cardiovascular mortality outcome. Supplementary Figure-5: cumulative meta-analysis for the 1-year mortality outcome. Supplementary Figure-6: cumulative meta-analysis for the 2-year mortality outcome. Supplementary Figure-7: Cumulative meta-analysis for the 30-day mortality outcome. Supplementary Figure-8: Cumulative meta-analysis for the cardiovascular mortality outcome. Supplementary Figure-9: funnel plot for the heterogeneity of the included studies. [file 2753146.f1.zip]

Archive with 2 entries (1 files):
- 2753146 .f1/
- 2753146 .f1/mat.2753146.v2.docx
